# Supplementary material for: Potential effects of climate change on geographic distribution of the Tertiary relict tree species Davidia involucrata in China
Source: PubMed Central journal article supplement (PMC5341038; doi:10.1038/srep43822), 2017-03-08

## Supplementary information

### Potential effects of climate change on geographic distribution of the Tertiary relict tree species *Davidia involucrata* in China

Cindy Q. Tang<sup>1\*</sup>, Yi-Fei Dong<sup>1</sup>, Sonia Herrando-Moraira<sup>2</sup>, Tetsuya Matsui<sup>3</sup>, Haruka Ohashi<sup>3</sup>, Long-Yuan He<sup>4</sup>, Katsuhiko Nakao<sup>5</sup>, Nobuyuki Tanaka<sup>6</sup>, Mizuki Tomita<sup>7</sup>, Xiao-Shuang Li<sup>8</sup>, Hai-Zhong Yan<sup>1</sup>, Ming-Chun Peng<sup>1\*</sup>, Jun Hu<sup>9</sup>, Ruo-Han Yang<sup>1</sup>, Wang-Jun Li<sup>1</sup>, Kai Yan<sup>10</sup>, Xiuli Hou<sup>11</sup>, Zhi-Ying Zhang<sup>1</sup>, Jordi López-Pujol<sup>2</sup>

<sup>1</sup> Institute of Ecology and Geobotany, Yunnan University, Kunming 650091, China

<sup>2</sup> Botanic Institute of Barcelona (IBB-CSIC-ICUB), Passeig del Migdia s/n, Barcelona 08038, Spain

<sup>3</sup> Center for International Partnerships and Research on Climate Change, Forestry and Forest Products Research Institute, Matsunosato 1, Tsukuba-shi, Ibaraki-ken, 305-8687, Japan

<sup>4</sup> Kunming Institute of Forestry Exploration and Design, the State Forestry Administration of China, Kunming 650216, China

<sup>5</sup> Kansai Research Center, Forestry and Forest Products Research Institute, Momoyama, Kyoto, 612-0855 Japan

<sup>6</sup> Tokyo University of Agriculture, 1-1-1 Sakuragaoka, Setagaya-ku, Tokyo 156-8502, Japan

<sup>7</sup> Tokyo University of Information Sciences, 4-1 Onaridai Wakaba-ku, Chiba 265-8501, Japan

<sup>8</sup> Yunnan Academy of Forestry, 650204 Kunming, China

<sup>9</sup> Key Laboratory of Mountain Ecological Restoration and Bioresource Utilization and Ecological Restoration Biodiversity Conservation, Key Laboratory of Sichuan Province, Chengdu Institute of Biology, Chinese Academy of Sciences, Chengdu 610041, China

<sup>10</sup> Center for Mountain Ecosystem Studies, Kunming Institute of Botany, Chinese Academy of Sciences, 650201 Kunming, China

<sup>11</sup> Department of Life Science and Technology, Kunming University, Kunming 650214, China

Correspondence and request for materials should be addressed to C.Q.T (e-mail: [cindyqtang@aol.com](mailto:cindyqtang@aol.com)) or M.-C.P. (email: [mchpeng@ynu.edu.cn](mailto:mchpeng@ynu.edu.cn))

**Table S1. Pearson’s correlations among the 19 bioclimatic variables used in this study (underlined, coefficient values  $\geq |0.85|$ ). The meaning of all variables is included in the footnote (in bold are the selected variables for building the SDM definitive models).**

|       | bio1   | bio2   | bio3   | bio4   | bio5   | bio6   | bio7   | bio8   | bio9   | bio10  | bio11  | bio12  | bio13  | bio14  | bio15  | bio16  | bio17  | bio18  | bio19  |
|-------|--------|--------|--------|--------|--------|--------|--------|--------|--------|--------|--------|--------|--------|--------|--------|--------|--------|--------|--------|
| bio1  | 1      | -0.401 | 0.607  | -0.765 | 0.853  | 0.967  | -0.751 | 0.833  | 0.941  | 0.905  | 0.970  | 0.638  | 0.646  | 0.181  | 0.122  | 0.652  | 0.241  | 0.385  | 0.258  |
| bio2  | -0.401 | 1      | 0.061  | 0.375  | -0.185 | -0.496 | 0.547  | -0.254 | -0.384 | -0.322 | -0.417 | -0.646 | -0.469 | -0.636 | 0.526  | -0.493 | -0.663 | -0.554 | -0.619 |
| bio3  | 0.607  | 0.061  | 1      | -0.857 | 0.254  | 0.687  | -0.760 | 0.281  | 0.689  | 0.284  | 0.732  | 0.447  | 0.519  | -0.178 | 0.384  | 0.523  | -0.111 | 0.278  | -0.048 |
| bio4  | -0.765 | 0.375  | -0.857 | 1      | -0.339 | -0.889 | 0.977  | -0.362 | -0.851 | -0.420 | -0.897 | -0.639 | -0.624 | -0.139 | -0.134 | -0.640 | -0.207 | -0.427 | -0.238 |
| bio5  | 0.853  | -0.185 | 0.254  | -0.339 | 1      | 0.704  | -0.306 | 0.908  | 0.719  | 0.983  | 0.712  | 0.362  | 0.409  | 0.087  | 0.130  | 0.402  | 0.119  | 0.108  | 0.133  |
| bio6  | 0.967  | -0.496 | 0.687  | -0.889 | 0.704  | 1      | -0.891 | 0.701  | 0.960  | 0.778  | 0.995  | 0.697  | 0.677  | 0.243  | 0.064  | 0.688  | 0.308  | 0.441  | 0.327  |
| bio7  | -0.751 | 0.547  | -0.760 | 0.977  | -0.306 | -0.891 | 1      | -0.359 | -0.828 | -0.416 | -0.880 | -0.704 | -0.646 | -0.270 | -0.003 | -0.666 | -0.336 | -0.522 | -0.353 |
| bio8  | 0.833  | -0.254 | 0.281  | -0.362 | 0.908  | 0.701  | -0.359 | 1      | 0.635  | 0.934  | 0.705  | 0.452  | 0.481  | 0.107  | 0.172  | 0.477  | 0.138  | 0.308  | 0.108  |
| bio9  | 0.941  | -0.384 | 0.689  | -0.851 | 0.719  | 0.960  | -0.828 | 0.635  | 1      | 0.768  | 0.964  | 0.611  | 0.613  | 0.175  | 0.077  | 0.621  | 0.244  | 0.334  | 0.291  |
| bio10 | 0.905  | -0.322 | 0.284  | -0.420 | 0.983  | 0.778  | -0.416 | 0.934  | 0.768  | 1      | 0.777  | 0.473  | 0.493  | 0.173  | 0.084  | 0.490  | 0.211  | 0.245  | 0.214  |
| bio11 | 0.970  | -0.417 | 0.732  | -0.897 | 0.712  | 0.995  | -0.880 | 0.705  | 0.964  | 0.777  | 1      | 0.675  | 0.673  | 0.182  | 0.130  | 0.683  | 0.248  | 0.418  | 0.272  |
| bio12 | 0.638  | -0.646 | 0.447  | -0.639 | 0.362  | 0.697  | -0.704 | 0.452  | 0.611  | 0.473  | 0.675  | 1      | 0.932  | 0.480  | -0.079 | 0.953  | 0.544  | 0.834  | 0.520  |
| bio13 | 0.646  | -0.469 | 0.519  | -0.624 | 0.409  | 0.677  | -0.646 | 0.481  | 0.613  | 0.493  | 0.673  | 0.932  | 1      | 0.232  | 0.183  | 0.992  | 0.300  | 0.746  | 0.298  |
| bio14 | 0.181  | -0.636 | -0.178 | -0.139 | 0.087  | 0.243  | -0.270 | 0.107  | 0.175  | 0.173  | 0.182  | 0.480  | 0.232  | 1      | -0.580 | 0.250  | 0.985  | 0.392  | 0.927  |
| bio15 | 0.122  | 0.526  | 0.384  | -0.134 | 0.130  | 0.064  | -0.003 | 0.172  | 0.077  | 0.084  | 0.130  | -0.079 | 0.183  | -0.580 | 1      | 0.148  | -0.565 | -0.080 | -0.525 |
| bio16 | 0.652  | -0.493 | 0.523  | -0.640 | 0.402  | 0.688  | -0.666 | 0.477  | 0.621  | 0.490  | 0.683  | 0.953  | 0.992  | 0.250  | 0.148  | 1      | 0.318  | 0.771  | 0.312  |
| bio17 | 0.241  | -0.663 | -0.111 | -0.207 | 0.119  | 0.308  | -0.336 | 0.138  | 0.244  | 0.211  | 0.248  | 0.544  | 0.300  | 0.985  | -0.565 | 0.318  | 1      | 0.444  | 0.952  |
| bio18 | 0.385  | -0.554 | 0.278  | -0.427 | 0.108  | 0.441  | -0.522 | 0.308  | 0.334  | 0.245  | 0.418  | 0.834  | 0.746  | 0.392  | -0.080 | 0.771  | 0.444  | 1      | 0.378  |
| bio19 | 0.258  | -0.619 | -0.048 | -0.238 | 0.133  | 0.327  | -0.353 | 0.108  | 0.291  | 0.214  | 0.272  | 0.520  | 0.298  | 0.927  | -0.525 | 0.312  | 0.952  | 0.378  | 1      |

bio1 = annual mean temperature; **bio2 = mean diurnal range [mean of monthly (max temp – min temp)]**; bio3 = isothermality [(bio2/bio7) × 100]; **bio4 = temperature seasonality (standard deviation × 100)**; bio5 = maximum temperature of the warmest month; bio6 = minimum temperature of the coldest month; bio7 = temperature annual range (bio5 – bio6); bio8 = mean temperature of the wettest quarter; **bio9 = mean temperature of the driest quarter**; **bio10 = mean temperature of the warmest quarter**; bio11 = mean temperature of the coldest quarter; bio12 = annual precipitation; bio13 = precipitation of the wettest month; bio14 = precipitation of the driest month; **bio15 = precipitation seasonality**; **bio16 = precipitation of the wettest quarter**; bio17 = precipitation of the driest quarter; **bio18 = precipitation of the warmest quarter**; **bio19 = precipitation of the coldest quarter**.

**Table S2. Reduction of suitable area for *Davidia involucrata* after uncertainty is taking into account.**

| Model                   | “Standard” models                       |                                                      |                                              | “Refined” models                        |                                                      |                                              | Percentage of area loss applying uncertainties (%) |                                                      |                                              |
|-------------------------|-----------------------------------------|------------------------------------------------------|----------------------------------------------|-----------------------------------------|------------------------------------------------------|----------------------------------------------|----------------------------------------------------|------------------------------------------------------|----------------------------------------------|
|                         | Total Predicted area (km <sup>2</sup> ) | Predicted area (km <sup>2</sup> ) from threshold–0.5 | Predicted area (km <sup>2</sup> ) from 0.5–1 | Total Predicted area (km <sup>2</sup> ) | Predicted area (km <sup>2</sup> ) from threshold–0.5 | Predicted area (km <sup>2</sup> ) from 0.5–1 | Total Predicted area (km <sup>2</sup> )            | Predicted area (km <sup>2</sup> ) from threshold–0.5 | Predicted area (km <sup>2</sup> ) from 0.5–1 |
| Present                 | 847,764                                 | 655,617                                              | 192,147                                      | 534,953                                 | 350,488                                              | 184,465                                      | 36.9                                               | 46.54                                                | 3.99                                         |
| Mid-Holocene-CCSM       | 873,910                                 | 699,223                                              | 174,687                                      | 292,256                                 | 131,119                                              | 161,137                                      | 66.56                                              | 81.25                                                | 7.76                                         |
| Mid-Holocene-MIROC      | 945,504                                 | 606,970                                              | 338,534                                      | 408,637                                 | 116,960                                              | 291,677                                      | 56.78                                              | 80.73                                                | 13.84                                        |
| Mid-Holocene-MPI        | 871,248                                 | 610,243                                              | 261,005                                      | 444,012                                 | 202,967                                              | 241,045                                      | 49.04                                              | 66.74                                                | 7.65                                         |
| <i>Average Holocene</i> | <i>896,887</i>                          | <i>638,812</i>                                       | <i>258,075</i>                               | <i>381,635</i>                          | <i>150,349</i>                                       | <i>231,286</i>                               | <i>57.46</i>                                       | <i>76.24</i>                                         | <i>9.75</i>                                  |
| LGM-CCSM                | 984,920                                 | 606,938                                              | 377,982                                      | 654,131                                 | 283,554                                              | 370,577                                      | 33.59                                              | 53.28                                                | 1.96                                         |
| LGM-MIROC               | 1,102,804                               | 651,027                                              | 451,777                                      | 605,354                                 | 215,318                                              | 390,036                                      | 45.11                                              | 66.93                                                | 13.67                                        |
| LGM-MPI                 | 903,715                                 | 492,204                                              | 411,511                                      | 696,462                                 | 287,786                                              | 408,676                                      | 22.93                                              | 41.53                                                | 0.69                                         |
| <i>Average LGM</i>      | <i>997,146</i>                          | <i>583,390</i>                                       | <i>413,757</i>                               | <i>651,982</i>                          | <i>262,219</i>                                       | <i>389,763</i>                               | <i>33.88</i>                                       | <i>53.91</i>                                         | <i>5.44</i>                                  |
| 2070-CCSM RCP 2.6       | 839,830                                 | 698,690                                              | 141,140                                      | 362,542                                 | 227,309                                              | 135,233                                      | 56.83                                              | 67.47                                                | 4.19                                         |
| 2070-GFDL RCP 2.6       | 847,500                                 | 799,674                                              | 47,826                                       | 194,921                                 | 154,649                                              | 40,272                                       | 77.00                                              | 80.66                                                | 15.79                                        |
| 2070-MPI RCP 2.6        | 715,079                                 | 624,053                                              | 91,026                                       | 353,095                                 | 262,546                                              | 90,549                                       | 50.62                                              | 57.93                                                | 0.52                                         |
| 2070-CCSM RCP 8.5       | 733,917                                 | 650,827                                              | 83,090                                       | 218,920                                 | 138,977                                              | 79,943                                       | 70.17                                              | 78.65                                                | 3.79                                         |
| 2070-GFDL RCP 8.5       | 878,918                                 | 847,573                                              | 31,345                                       | 110,608                                 | 89,413                                               | 21,195                                       | 87.42                                              | 89.45                                                | 32.38                                        |
| 2070-MPI RCP 8.5        | 521,571                                 | 484,006                                              | 37,565                                       | 141,457                                 | 104,742                                              | 36,715                                       | 72.88                                              | 78.36                                                | 2.26                                         |
| <i>Average 2070</i>     | <i>756,136</i>                          | <i>684,137</i>                                       | <i>71,999</i>                                | <i>230,257</i>                          | <i>162,939</i>                                       | <i>67,318</i>                                | <i>69.15</i>                                       | <i>75.42</i>                                         | <i>9.82</i>                                  |

**Table S3. Mean values for the 19 bioclimatic variables for the study area (i.e. the rectangle comprised between 15–56°N and 72–143°E).** The mean values have been obtained averaging the individual values for all the 2.5 arc-min cells contained within the study area (1,239,717 cells).

| Climatic scenario  | Variable    |            |             |                 |            |              |             |            |             |            |              |               |               |            |             |               |             |               |              |
|--------------------|-------------|------------|-------------|-----------------|------------|--------------|-------------|------------|-------------|------------|--------------|---------------|---------------|------------|-------------|---------------|-------------|---------------|--------------|
|                    | bio1 (°C)   | bio2 (°C)  | bio3 (%)    | bio4 (°C × 100) | bio5 (°C)  | bio6 (°C)    | bio7 (°C)   | bio8 (°C)  | bio9 (°C)   | bio10 (°C) | bio11 (°C)   | bio12 (mm)    | bio13 (mm)    | bio14 (mm) | bio15 (%)   | bio16 (mm)    | bio17 (mm)  | bio18 (mm)    | bio19 (mm)   |
| Present            | 7.15±10.62  | 11.99±2.23 | 31.01±9.20  | 1012.20±413.41  | 26.60±7.37 | -14.09±15.65 | 40.70±11.72 | 18.18±7.16 | -4.21±15.74 | 19.45±7.39 | -6.55±15.26  | 690.27±623.25 | 153.39±144.21 | 9.24±13.95 | 86.61±27.90 | 391.39±370.08 | 35.35±47.67 | 302.58±258.12 | 42.50±62.47  |
| Mid-Holocene-CCSM  | 6.08±10.43  | 12.04±2.22 | 29.54±9.48  | 1105.73±450.68  | 27.31±6.84 | -16.00±15.60 | 43.31±12.92 | 18.55±7.00 | -6.14±15.67 | 19.85±6.79 | -8.43±15.22  | 717.18±648.01 | 163.90±159.02 | 8.87±13.75 | 87.98±28.55 | 418.81±406.08 | 33.80±46.85 | 329.15±289.49 | 39.50±58.41  |
| Mid-Holocene-MIROC | 6.60±9.83   | 12.01±2.53 | 28.68±8.55  | 1127.64±462.29  | 28.61±6.46 | -15.73±15.56 | 44.35±14.19 | 19.24±7.13 | -5.57±15.33 | 20.87±6.65 | -8.21±14.64  | 734.49±723.82 | 172.10±180.62 | 9.15±14.59 | 86.10±31.17 | 430.50±460.22 | 35.47±50.01 | 344.24±338.40 | 43.00±63.55  |
| Mid-Holocene-MPI   | 6.26±10.30  | 12.02±2.28 | 29.67±9.56  | 1091.87±447.53  | 27.25±6.88 | -15.86±15.59 | 43.08±13.07 | 18.50±7.02 | -5.73±15.45 | 19.85±6.79 | -8.14±15.14  | 769.64±720.16 | 179.99±186.21 | 8.77±13.59 | 89.14±29.19 | 450.01±450.38 | 34.30±47.72 | 349.77±310.25 | 40.21±61.89  |
| Average Holocene   | 6.31±0.26   | 12.02±0.02 | 29.30±0.54  | 1108.41±18.04   | 27.72±0.77 | -15.91±0.16  | 43.58±0.68  | 18.76±0.41 | -5.81±0.29  | 20.19±0.59 | -8.26±0.15   | 740.44±26.73  | 172.00±8.05   | 8.93±0.20  | 87.74±1.53  | 433.11±15.76  | 34.52±0.86  | 341.05±10.67  | 40.90±1.85   |
| LGM-CCSM           | 3.17±11.47  | 15.77±5.29 | 37.24±11.31 | 980.67±415.09   | 24.13±8.01 | -19.48±16.83 | 43.62±12.77 | 13.72±7.86 | -7.70±16.53 | 15.10±7.97 | -10.08±16.17 | 644.85±675.09 | 139.84±146.84 | 9.09±15.71 | 86.66±29.79 | 358.82±387.10 | 34.45±55.13 | 274.59±273.16 | 41.55±69.50  |
| LGM-MIROC          | 4.12±11.83  | 11.75±2.84 | 31.13±9.68  | 980.59±414.91   | 23.07±7.94 | -16.52±17.25 | 39.60±12.20 | 14.69±7.89 | -6.80±16.9  | 16.05±8.23 | -9.13±16.61  | 709.03±761.49 | 157.19±182.97 | 9.78±16.62 | 86.45±29.58 | 402.02±474.85 | 37.80±58.22 | 291.78±293.85 | 46.63±76.16  |
| LGM-MPI            | 3.44±11.57  | 12.68±2.59 | 32.68±10.39 | 1009.39±454.61  | 22.95±7.64 | -18.47±17.42 | 41.42±13.00 | 14.47±7.59 | -7.47±17.22 | 15.66±7.78 | -10.25±16.75 | 703.76±657.96 | 154.72±143.36 | 9.66±15.40 | 87.14±28.31 | 385.62±354.66 | 37.77±55.27 | 305.50±266.64 | 54.81±107.97 |
| Average LGM        | 3.58±0.49   | 13.40±2.10 | 33.68±3.18  | 990.22±16.60    | 23.38±0.65 | -18.16±1.50  | 41.55±2.01  | 14.29±0.21 | -7.32±0.47  | 15.60±0.48 | -9.82±0.60   | 685.87±35.62  | 150.58±9.39   | 9.51±0.37  | 86.75±0.35  | 382.15±21.81  | 36.67±1.93  | 290.62±15.49  | 47.66±6.69   |
| 2070-CCSM RCP 2.6  | 8.79±10.37  | 19.94±2.18 | 31.06±9.13  | 1007.92±411.17  | 28.24±7.56 | -12.18±15.19 | 40.42±11.47 | 19.84±6.98 | -2.42±15.45 | 21.13±7.27 | -4.74±14.95  | 722.84±650.86 | 163.83±156.09 | 8.77±13.03 | 85.55±27.49 | 413.94±392.39 | 34.80±45.09 | 316.30±272.36 | 43.19±65.86  |
| 2070-GFDL RCP 2.6  | 10.44±10.11 | 11.79±2.45 | 30.38±9.34  | 1027.8±420.34   | 30.33±6.89 | -10.51±14.89 | 40.85±11.60 | 21.60±6.83 | -0.57±15.61 | 23.17±6.97 | -3.23±14.72  | 777.33±666.59 | 182.03±162.82 | 9.53±14.03 | 87.33±26.87 | 452.31±403.21 | 38.14±50.21 | 345.84±282.00 | 47.36±68.83  |
| 2070-MPI RCP 2.6   | 8.82±10.59  | 11.84±2.20 | 31.01±9.28  | 992.12±406.15   | 28.04±7.46 | -12.15±15.54 | 40.20±11.47 | 19.68±7.11 | -2.25±15.92 | 20.98±7.47 | -4.44±15.41  | 695.88±625.12 | 157.10±148.87 | 9.83±14.50 | 83.86±26.99 | 394.36±381.18 | 37.87±49.93 | 297.56±260.11 | 47.12±97.30  |
| 2070-CCSM RCP 8.5  | 11.22±10.04 | 11.79±2.10 | 30.63±9.01  | 1003.82±403.73  | 30.74±7.15 | -9.65±14.71  | 40.39±11.19 | 22.05±6.93 | 3.78±15.00  | 23.57±7.13 | -2.25±14.50  | 762.11±695.42 | 176.26±170.55 | 8.55±11.89 | 85.30±28.19 | 443.62±433.01 | 34.77±42.05 | 327.14±292.03 | 43.68±74.04  |
| 2070-GFDL RCP 8.5  | 13.02±9.71  | 11.66±2.54 | 30.30±9.54  | 1023.42±404.61  | 32.82±6.68 | -7.58±14.01  | 40.40±10.92 | 24.16±6.60 | 2.50±15.06  | 25.77±6.74 | -0.49±14.02  | 789.20±672.20 | 187.18±163.54 | 9.00±12.34 | 88.74±27.57 | 461.62±406.18 | 36.43±44.26 | 358.19±292.63 | 48.37±75.14  |
| 2070-MPI RCP 8.5   | 11.42±10.3  | 11.65±2.17 | 30.42±9.25  | 994.34±403.85   | 31.00±7.45 | -9.33±15.21  | 40.33±11.37 | 21.93±7.29 | 0.94±15.76  | 23.76±7.43 | -1.94±14.94  | 718.87±665.43 | 162.51±160.23 | 9.81±14.79 | 82.18±27.40 | 410.75±412.47 | 38.30±54.54 | 300.44±274.46 | 50.89±131.65 |
| Average 2070       | 10.62±1.64  | 13.11±3.35 | 30.63±0.33  | 1008.24±14.74   | 30.20±1.81 | -10.23±1.77  | 40.43±0.22  | 21.54±1.65 | 0.33±2.53   | 23.06±1.80 | -2.85±1.61   | 744.37±37.08  | 171.49±12.05  | 9.25±0.55  | 85.49±2.35  | 429.43±26.76  | 36.72±1.64  | 324.25±24.37  | 46.77±2.91   |

**Table S4. Mean values standard deviation for the 19 bioclimatic variables for *Davidia involucrata* occurrences.** The mean values have been obtained averaging the individual values for all 275 species occurrences.

| Climatic scenario   | Variable   |           |            |                 |            |            |            |            |            |            |            |                |              |             |             |               |             |               |             |
|---------------------|------------|-----------|------------|-----------------|------------|------------|------------|------------|------------|------------|------------|----------------|--------------|-------------|-------------|---------------|-------------|---------------|-------------|
|                     | bio1 (°C)  | bio2 (°C) | bio3 (%)   | bio4 (°C × 100) | bio5 (°C)  | bio6 (°C)  | bio7 (°C)  | bio8 (°C)  | bio9 (°C)  | bio10 (°C) | bio11 (°C) | bio12 (mm)     | bio13 (mm)   | bio14 (mm)  | bio15 (%)   | bio16 (mm)    | bio17 (mm)  | bio18 (mm)    | bio19 (mm)  |
| Present             | 12.10±3.16 | 8.45±1.34 | 30.19±5.76 | 675.73±90.30    | 25.61±3.96 | -2.15±3.47 | 27.76±2.07 | 19.52±3.42 | 3.05±2.83  | 20.42±3.80 | 3.00±2.82  | 1193.93±209.83 | 214.16±39.09 | 17.75±9.58  | 70.52±13.83 | 580.32±95.11  | 61.44±31.07 | 565.55±93.16  | 61.72±30.93 |
| Mid-Holocen e-CCSM  | 11.25±3.19 | 8.56±1.35 | 29.14±5.40 | 733.83±90.29    | 25.38±4.72 | -3.71±3.57 | 29.10±2.19 | 20.04±3.78 | 1.46±2.83  | 20.20±3.80 | 1.38±2.86  | 1268.30±230.11 | 240.10±50.53 | 16.81±8.95  | 76.15±13.72 | 648.99±114.76 | 57.74±27.97 | 618.48±114.52 | 58.12±27.75 |
| Mid-Holocen e-MIROC | 10.97±3.28 | 8.33±1.38 | 28.62±4.73 | 736.06±74.70    | 24.74±4.04 | -3.88±3.83 | 28.66±2.09 | 19.51±3.61 | 1.22±2.98  | 19.90±3.82 | 1.17±2.92  | 1357.64±241.46 | 286.66±56.29 | 16.21±8.50  | 79.43±16.12 | 719.84±131.36 | 56.40±27.73 | 704.10±131.53 | 56.54±27.70 |
| Mid-Holocen e-MPI   | 10.85±3.17 | 8.10±1.32 | 27.62±4.86 | 745.81±76.37    | 24.86±3.90 | -4.04±3.49 | 28.90±1.85 | 19.71±3.68 | 1.15±2.68  | 20.05±3.77 | 0.96±2.74  | 1278.55±215.60 | 231.57±47.42 | 15.12±6.60  | 72.87±10.79 | 631.98±109.06 | 60.37±24.10 | 614.13±109.36 | 60.68±23.87 |
| Average Holocen e   | 11.02±0.21 | 8.33±0.23 | 28.46±0.77 | 738.57±6.37     | 24.99±0.34 | -3.88±0.17 | 28.89±0.22 | 19.75±0.27 | 1.28±0.16  | 20.05±0.15 | 1.17±0.21  | 1301.50±48.89  | 252.78±29.65 | 16.05±0.86  | 76.15±3.28  | 666.94±46.60  | 58.17±2.02  | 645.57±50.74  | 58.45±2.09  |
| LGM-CCSM            | 7.13±2.98  | 9.09±1.37 | 31.81±5.27 | 670.32±90.27    | 20.96±3.73 | -7.36±3.31 | 28.32±2.42 | 14.52±3.24 | -1.88±2.86 | 15.43±3.49 | -1.93±2.83 | 1408.13±360.22 | 250.18±54.17 | 21.24±12.83 | 70.90±13.91 | 679.78±147.14 | 73.16±41.63 | 661.78±142.27 | 73.43±41.45 |
| LGM-MIROC           | 8.98±3.18  | 8.35±2.02 | 29.91±7.39 | 670.77±90.37    | 22.45±3.80 | -5.13±3.60 | 27.58±1.91 | 16.38±3.39 | -0.02±2.93 | 17.29±3.72 | -0.07±2.93 | 1437.94±423.71 | 253.52±54.98 | 22.06±14.25 | 70.89±13.90 | 689.05±153.52 | 76.10±46.91 | 670.88±147.46 | 76.47±46.79 |
| LGM-MPI             | 8.25±3.27  | 8.66±1.32 | 30.44±5.10 | 666.50±78.18    | 21.70±4.05 | -6.45±3.67 | 28.15±2.16 | 15.61±3.52 | -0.88±2.86 | 16.47±3.85 | -0.91±2.89 | 1174.32±182.00 | 211.09±48.11 | 19.74±10.30 | 68.57±13.47 | 555.42±95.23  | 68.65±30.74 | 543.52±93.54  | 68.92±30.87 |
| Average LGM         | 8.12±0.93  | 8.70±0.37 | 30.72±0.98 | 669.20±2.35     | 21.70±0.75 | -6.31±1.12 | 28.02±0.39 | 15.50±0.93 | -0.93±0.93 | 16.40±0.93 | -0.97±0.93 | 1340.13±144.37 | 238.26±23.59 | 21.01±1.18  | 70.12±1.34  | 641.42±74.62  | 72.64±3.75  | 625.39±71.05  | 72.94±3.80  |
| 2070-CCSM RCP 2.6   | 13.39±3.13 | 8.58±1.26 | 30.65±5.44 | 670.10±90.04    | 26.87±3.94 | -0.83±3.37 | 27.70±1.98 | 20.81±3.42 | 4.45±2.78  | 21.75±3.79 | 4.40±2.78  | 1242.34±206.69 | 230.55±44.46 | 15.97±8.19  | 73.35±12.04 | 623.07±108.29 | 57.82±28.36 | 604.95±107.01 | 58.18±28.15 |
| 2070-GFDL RCP 2.6   | 15.18±3.13 | 8.68±1.28 | 31.05±5.69 | 686.42±101.38   | 29.04±4.00 | 1.29±3.30  | 27.74±2.31 | 22.60±3.63 | 6.08±2.74  | 23.74±3.88 | 6.03±2.76  | 1180.37±227.35 | 222.15±46.66 | 17.06±8.70  | 69.67±7.76  | 568.31±97.71  | 65.20±30.85 | 552.86±99.52  | 65.91±30.40 |
| 2070-MPI RCP 2.6    | 13.64±3.13 | 8.64±1.30 | 31.10±5.99 | 654.80±97.00    | 27.14±4.12 | -0.50±3.39 | 27.64±2.35 | 20.75±3.44 | 4.90±2.82  | 21.78±3.80 | 4.86±2.81  | 1171.58±198.17 | 219.32±40.24 | 17.21±10.03 | 70.70±15.86 | 575.47±101.28 | 61.26±31.42 | 554.00±103.57 | 61.87±31.11 |
| 2070-CCSM RCP 8.5   | 15.61±3.14 | 8.21±1.10 | 29.78±5.25 | 685.47±93.23    | 29.16±4.05 | 1.82±3.22  | 27.33±2.04 | 23.52±3.54 | 6.52±2.74  | 24.05±3.83 | 6.47±2.73  | 1253.10±207.90 | 232.13±39.97 | 13.00±5.21  | 74.25±9.98  | 628.64±103.06 | 49.42±19.90 | 617.80±106.32 | 49.83±19.70 |
| 2070-GFDL RCP 8.5   | 17.00±3.13 | 9.06±1.21 | 31.10±5.16 | 719.15±96.71    | 31.12±3.95 | 2.28±3.26  | 28.83±2.41 | 25.48±3.88 | 9.32±3.40  | 25.87±3.81 | 7.39±2.70  | 1126.87±220.45 | 216.16±45.14 | 16.82±8.96  | 74.69±4.49  | 573.92±112.35 | 61.10±23.92 | 557.81±118.20 | 66.61±29.26 |
| 2070-MPI RCP 8.5    | 15.32±3.11 | 8.81±1.30 | 30.78±5.91 | 674.94±95.45    | 29.84±4.06 | 1.35±3.32  | 28.48±2.32 | 23.13±3.39 | 6.97±2.77  | 24.37±3.81 | 6.94±2.76  | 1188.93±217.26 | 225.74±39.90 | 15.41±9.54  | 74.48±14.32 | 601.86±105.27 | 53.89±29.74 | 576.92±101.72 | 54.27±29.45 |
| Average 2070        | 15.02±1.34 | 8.66±0.28 | 30.74±0.51 | 681.81±21.65    | 28.86±1.62 | 0.90±1.27  | 27.95±     | 22.72±0.57 | 6.37±1.73  | 23.59±1.59 | 6.02±1.17  | 1193.87±47.01  | 224.34±6.29  | 15.91±1.59  | 72.86±2.14  | 595.21±26.47  | 58.12±5.70  | 577.39±28.02  | 59.45±6.63  |

**Table S5. The suitable areas (potential habitats) included within (and outside) the network of protected areas (PAs) (nature reserves) in China.**

|                   | <b>Total Predicted area in China (km<sup>2</sup>)</b> | <b>Total predicted area in China within PAs (km<sup>2</sup> and %)</b> | <b>Total predicted area in China outside PAs (km<sup>2</sup> and %)</b> | <b>Predicted area in China: threshold-0.5 China (km<sup>2</sup>)</b> | <b>Predicted area in China (threshold-0.5) within PAs (km<sup>2</sup> and %)</b> | <b>Predicted area in China (threshold-0.5) outside PAs (km<sup>2</sup> and %)</b> | <b>Predicted area in China: 0.5-1 (km<sup>2</sup>)</b> | <b>Predicted area in China (0.5-1) within PAs (km<sup>2</sup> and %)</b> | <b>Predicted area in China (0.5-1) outside PAs (km<sup>2</sup> and %)</b> |
|-------------------|-------------------------------------------------------|------------------------------------------------------------------------|-------------------------------------------------------------------------|----------------------------------------------------------------------|----------------------------------------------------------------------------------|-----------------------------------------------------------------------------------|--------------------------------------------------------|--------------------------------------------------------------------------|---------------------------------------------------------------------------|
| Present           | 511,468                                               | 133,409<br>(26.08)                                                     | 378,059<br>(73.92)                                                      | 328,718                                                              | 77,205<br>(23.49)                                                                | 251,513<br>(76.51)                                                                | 182,750                                                | 56,204<br>(30.75)                                                        | 126,546<br>(69.25)                                                        |
| 2070-CCSM RCP 2.6 | 339,827                                               | 104,203<br>(30.66)                                                     | 235,624<br>(69.34)                                                      | 207,021                                                              | 60,189<br>(29.07)                                                                | 146,832<br>(70.93)                                                                | 132,806                                                | 44,014<br>(33.14)                                                        | 88,792<br>(66.86)                                                         |
| 2070-GFDL RCP 2.6 | 179,024                                               | 61,043<br>(34.10)                                                      | 117,981<br>(65.90)                                                      | 142,677                                                              | 45,025<br>(31.56)                                                                | 97,652<br>(68.44)                                                                 | 36,347                                                 | 16,018<br>(44.07)                                                        | 20,329<br>(55.93)                                                         |
| 2070-MPI RCP 2.6  | 342,958                                               | 102,318<br>(29.83)                                                     | 240,640<br>(70.17)                                                      | 252,436                                                              | 71,057<br>(28.15)                                                                | 181,379<br>(71.85)                                                                | 90,522                                                 | 31,261<br>(34.53)                                                        | 59,261<br>(65.47)                                                         |
| 2070-CCSM RCP 8.5 | 206,154                                               | 74,171<br>(35.98)                                                      | 131,983<br>(64.02)                                                      | 127,400                                                              | 43,041<br>(33.78)                                                                | 84,359<br>(66.22)                                                                 | 78,754                                                 | 31,130<br>(39.53)                                                        | 47,624<br>(60.47)                                                         |
| 2070-GFDL RCP 8.5 | 93,521                                                | 39,682<br>(42.43)                                                      | 53,839<br>(57.57)                                                       | 77,039                                                               | 32,158<br>(41.74)                                                                | 44,881<br>(58.26)                                                                 | 16,482                                                 | 7,524 (45.65)                                                            | 8,958<br>(54.35)                                                          |
| 2070-MPI RCP 8.5  | 133,324                                               | 50,911<br>(38.19)                                                      | 82,413<br>(61.81)                                                       | 96,609                                                               | 34,751<br>(35.97)                                                                | 61,858<br>(64.03)                                                                 | 36,715                                                 | 16,160<br>(44.01)                                                        | 20,555<br>(55.99)                                                         |
| Average 2070      | 215,801                                               | 72,055<br>(35.20)                                                      | 143,747<br>(64.80)                                                      | 150,530                                                              | 47,704<br>(33.38)                                                                | 102,827<br>(66.62)                                                                | 65,271                                                 | 24,351<br>(40.16)                                                        | 40,920<br>(59.84)                                                         |

**Figure S1. Species distribution modeling in *Davidia involucrata* taking into account the uncertainty derived from the evaluation of model performance.** The maps on the left are the “uncertainty” maps. The maps in the center are the “standard” models. The maps on the right are the “refined” models. (A-C) Present, (D-F) Mid-Holocene-CCSM, (G-I) Mid-Holocene-MIROC, (J-L) Mid-Holocene-MPI, (M-O) LGM-CCSM, (P-R). LGM-MIROC, (S-U) LGM-MPI, (V-X) 2070-CCSM RCP 2.6, (Y-Za) 2070-GFDL RCP 2.6, (Zb-Zd) 2070-MPI RCP 2.6, (Ze-Zg) 2070-CCSM RCP 8.5, (Zh-Zj) 2070-GFDL RCP 8.5, (Zk-Zm), 2070-MPI RCP 8.5. Purple lines: national boundaries between China and India (at issue). Maps were generated using the software ArcGIS 10.2.

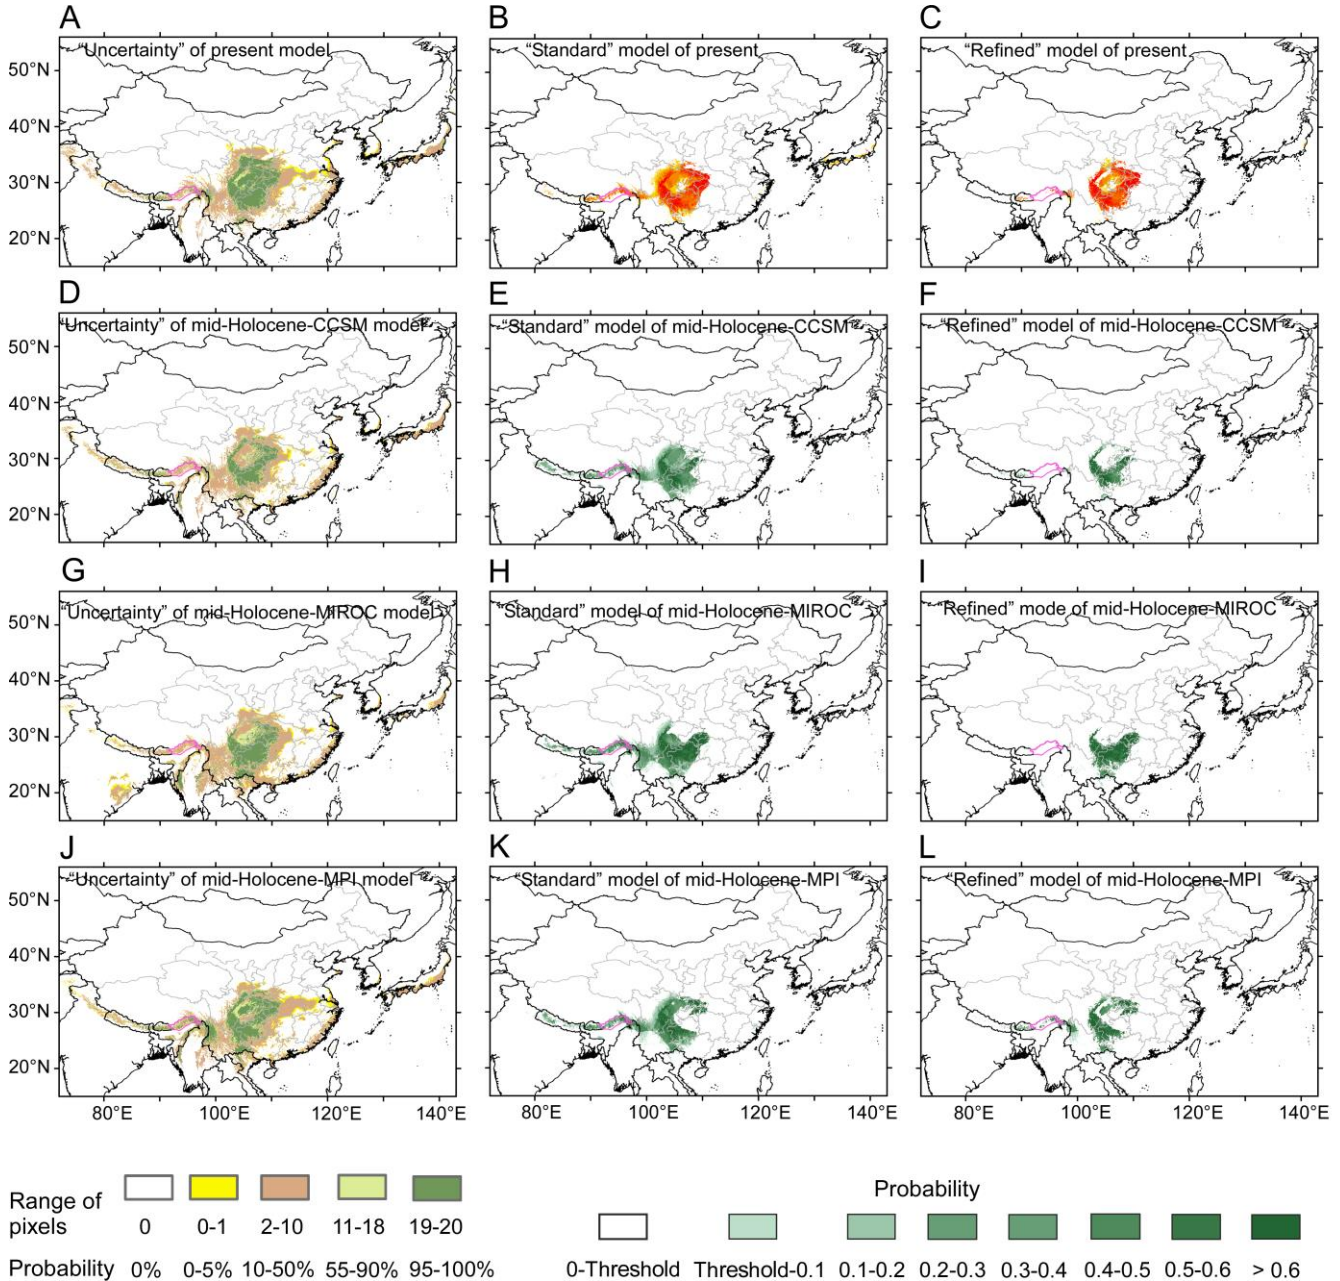

Figure S1 Continued.

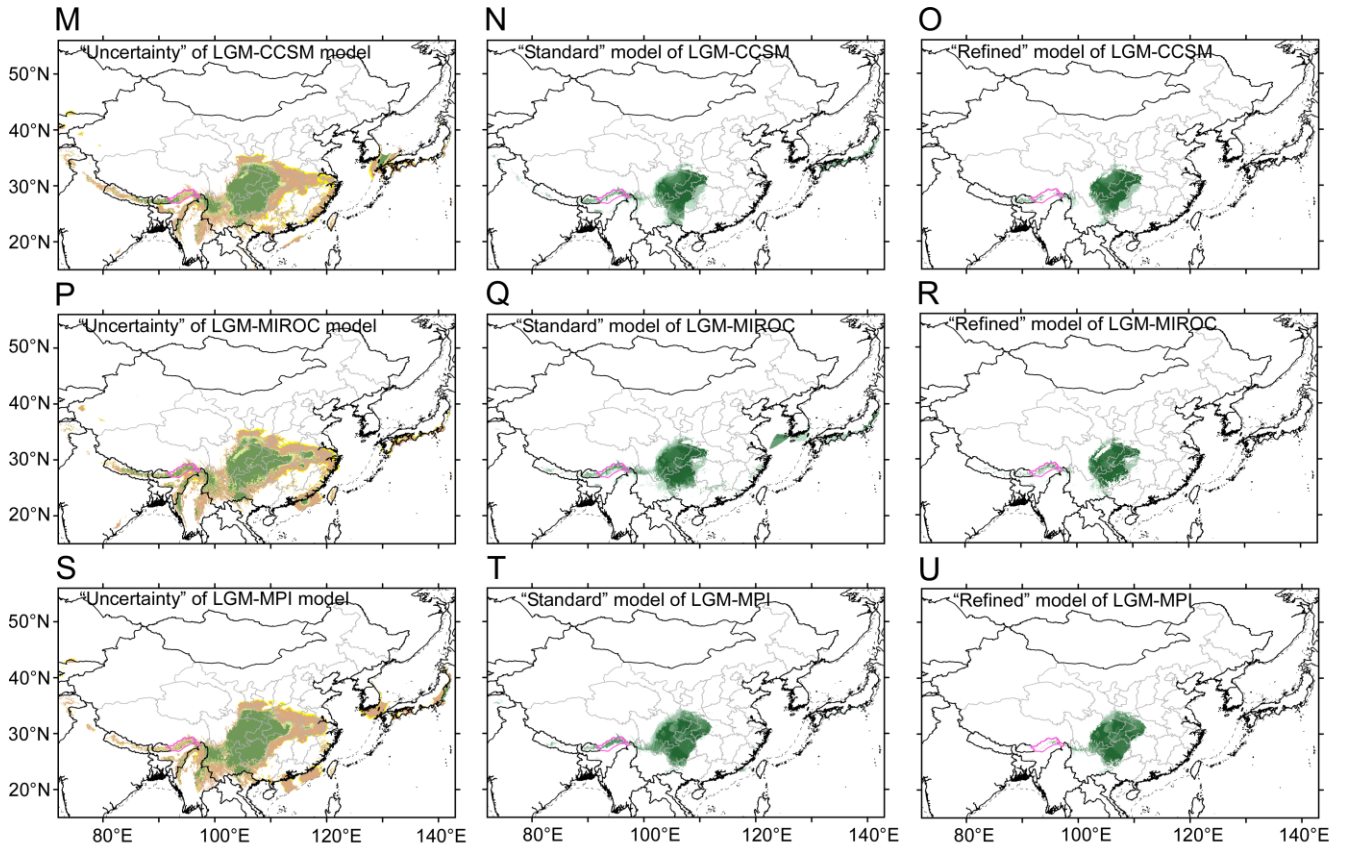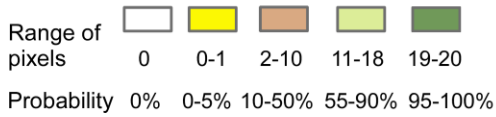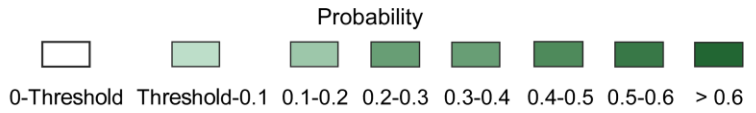



**Figure S1 Continued.**

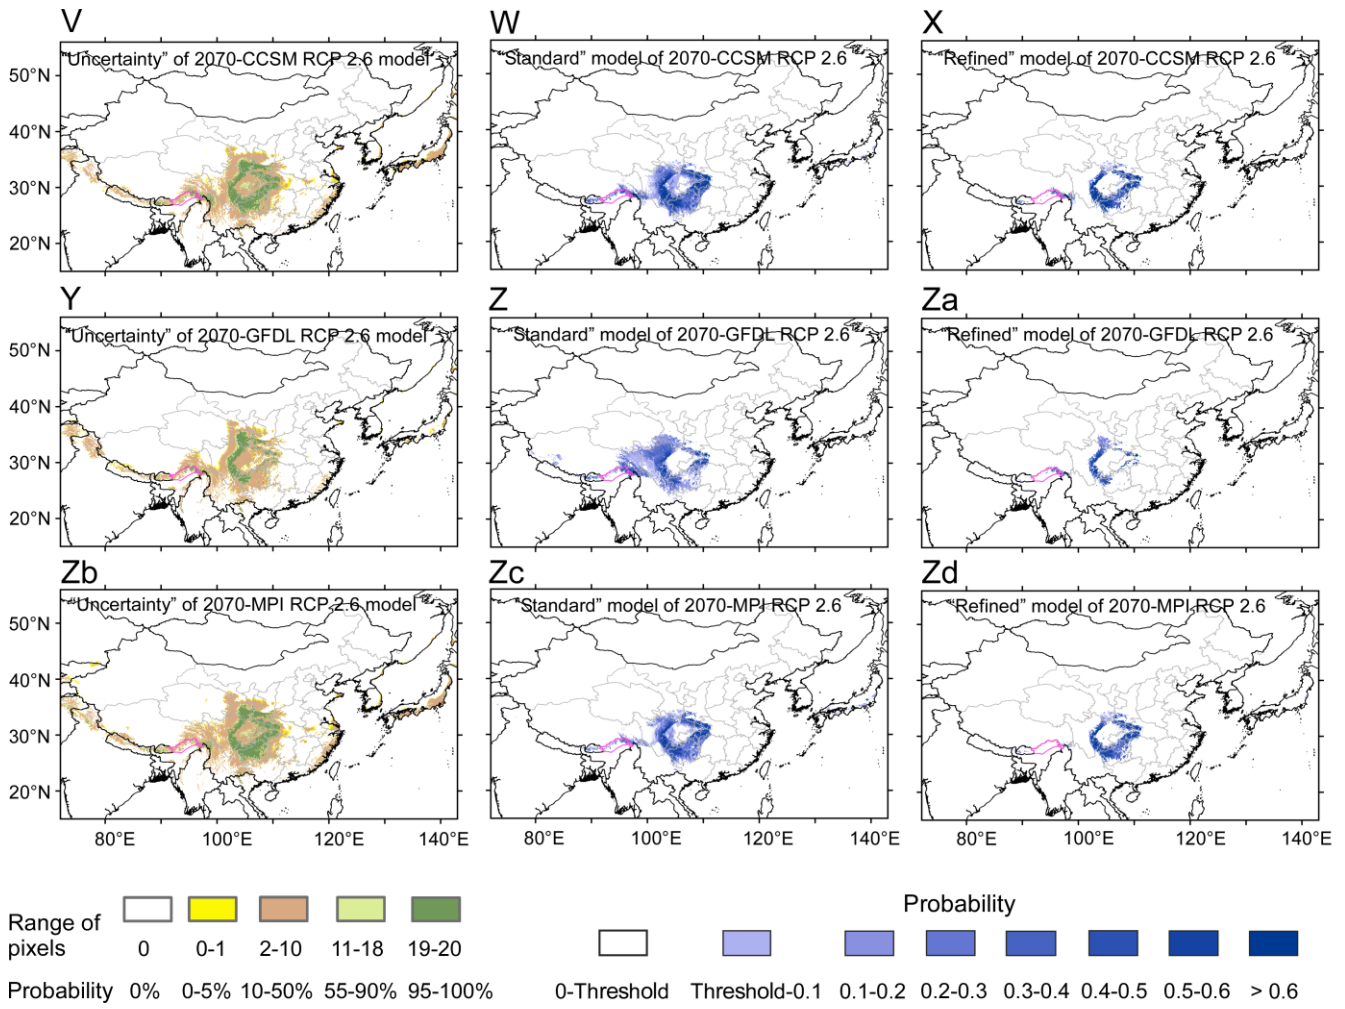

**Figure S1 Continued.**

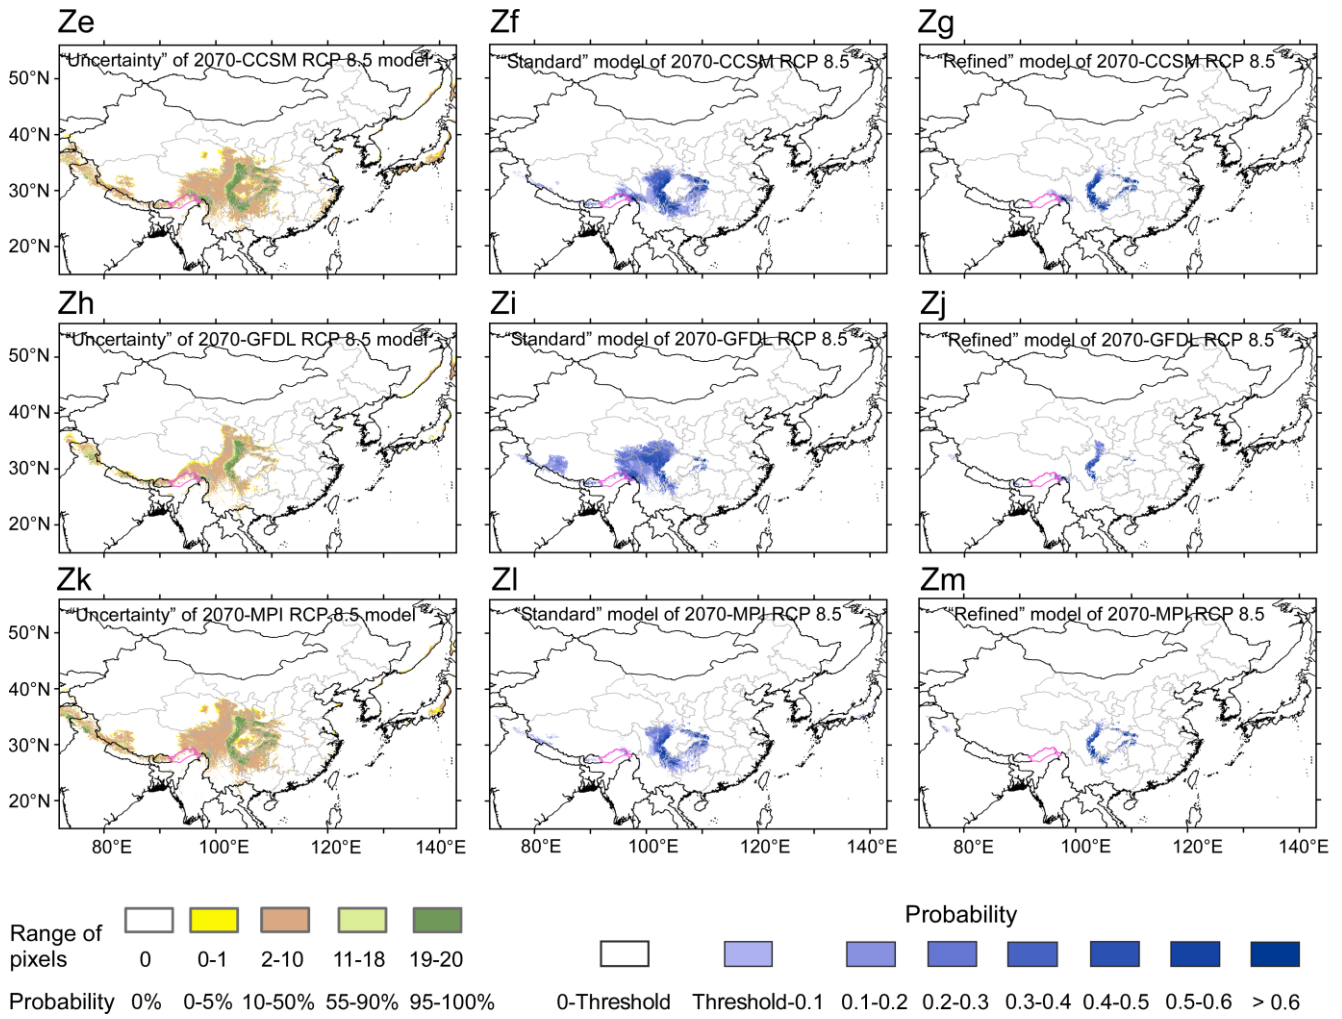

**Figure S2. Mean and standard deviation (SD) values for four bioclimatic variables (bio1, annual mean temperature in °C; bio4, temperature seasonality (SD × 100); bio12, annual precipitation in mm; bio18, precipitation of the warmest quarter) considering different periods (LGM, Holocene, present and 2070) for: (A), (B), (C) and (D) all the 2.5 arc-min cells contained within the study area 1,239,717 cells; (E), (F), (G) and (H) all 275 occurrences of the species.**

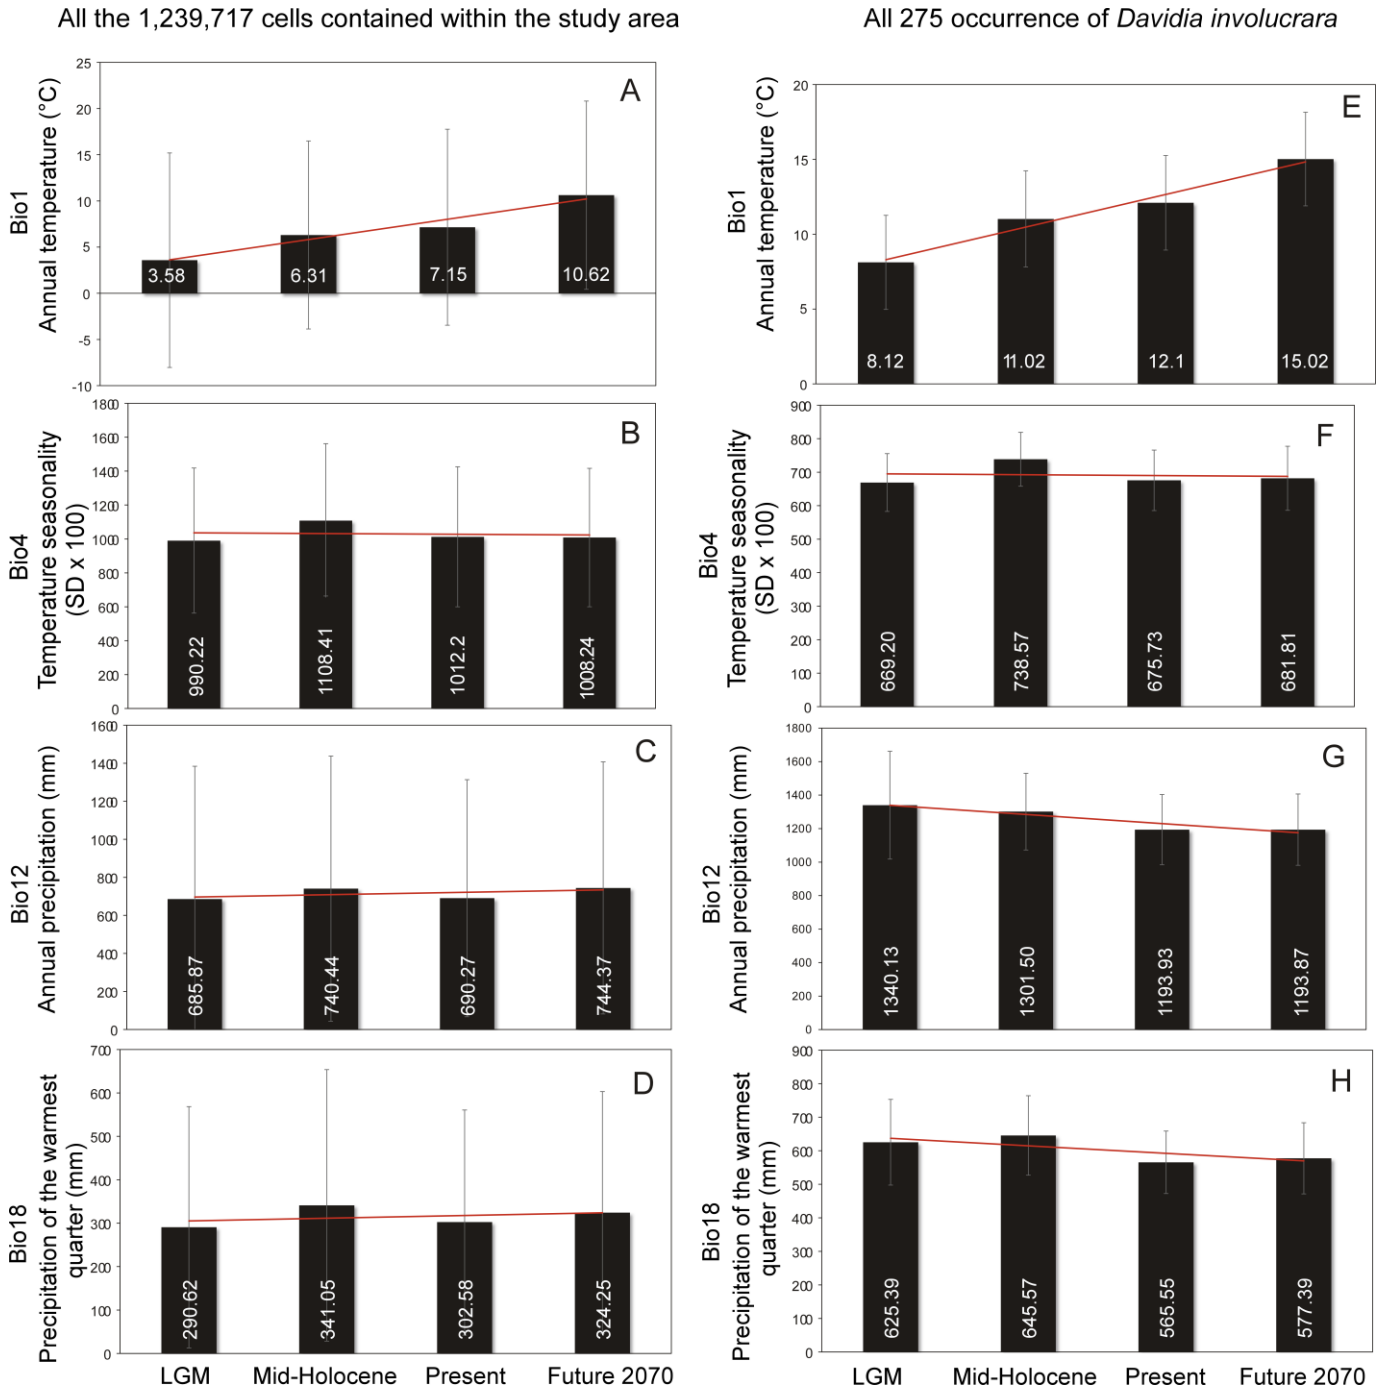

**Figure S3. Predicted potential habitats with and without protection in China under future 2070 climatic scenarios, with areas proposed for conservation.** (A) 2070-GFDL RCP 2.6, (B) 2070-MPI RCP 2.6, (C) 2070-CCSM RCP 8.5, (D) 2070-GFDL RCP 8.5, (E) 2070-MPI RCP 8.5. Purple lines: national boundaries between China and India (at issue). Maps were generated using the software ArcGIS 10.2.

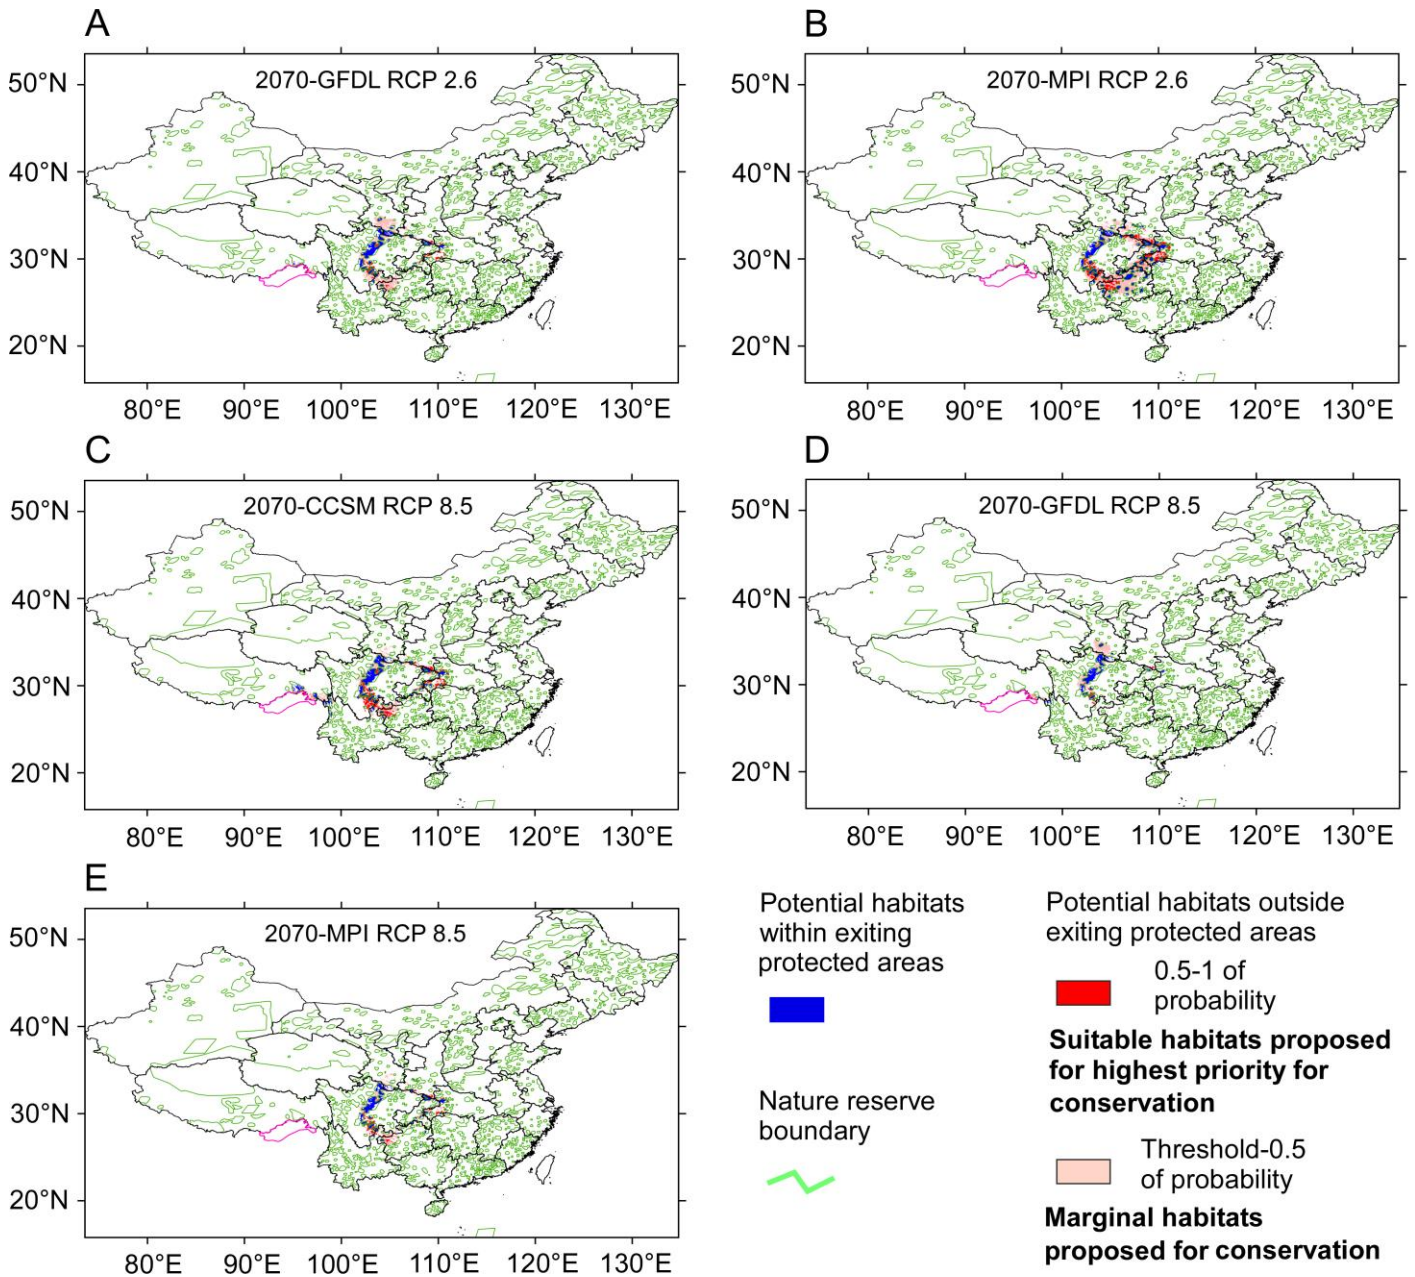

Supplement: srep43822-s1.pdf [file srep43822-s1.pdf]
